# Supplementary material for: An investigation into ‘community expectations’ surrounding animal welfare law enforcement in Australia
Source: Frontiers journal article supplement (doi:10.3389/fanim.2022.991042), 2022-11-11
Supplement: Data_Sheet_1.docx [file Data_Sheet_1.docx]

Supplementary Material

# Supplementary Data

Questionnaire used for analysis.

Q2 What gender do you identify as?

- Male (1)
- Female (2)
- Non-binary / third gender (3)
- Other (4)
- Prefer not to say (5)

Q3 What is your age range?

- 18-24 years old (1)
- 25-34 years old (2)
- 35-44 years old (3)
- 45-54 years old (4)
- 55-64 years old (5)
- 65 years or older (6)
- Prefer not to say (7)

Q4 Which Australian state/territory do you live in?

- Australian Capital Territory (1)
- New South Wales (2)
- Northern Territory (3)
- Queensland (4)
- South Australia (5)
- Tasmania (6)
- Victoria (7)
- Western Australia (8)
- Prefer not to say (9)

Q5 Would you describe your current residential location as:

- Urban (eg. major city, town, suburban) (1)
- Rural (eg. country town, remote) (2)
- Prefer not to say (3)

Q6 How would you self-describe your primary ethnic origin?

- Aboriginal or Torres Strait Islander (1)
- European (2)
- Asian (3)
- Indian (4)
- Middle Eastern (5)
- African (6)
- North American (7)
- South American or Caribbean Islander (8)
- Oceanian or Australian (9)
- Prefer not to say (10)

Q7 What is the highest level of education you have completed?

- No formal education (1)
- High school (2)
- TAFE or equivalent (3)
- Bachelors degree (4)
- Masters or PhD (5)
- Prefer not to say (6)

Q8 Which best describes your current occupation?

- Professional (1)
- Technical and trade (2)
- Education (3)
- Retail and hospitality (4)
- Health care (5)
- Primary industry (6)
- Other (please specify) (7) ________________________________________________
- Currently unemployed (8)
- Retired (9)
- Prefer not to say (10)

Q9 Does your employment involve working with animals?

- Yes (1)
- No (2)
- Prefer not to say (3)

Q10 Do you work in legal practice or law enforcement?

- Yes (1)
- No (2)
- Prefer not to say (3)

Q11 Do you regularly volunteer for, or donate to an animal welfare group?

- Yes (1)
- No (2)
- Prefer not to say (3)

Q12 Do you live with or own a pet?

- Yes (1)
- No (2)
- Prefer not to say (3)

Q13 Do you follow a specific diet for ethical reasons relating to animal welfare?

- Vegan (consumes no food of animal origins) (1)
- Vegetarian (consumes dairy or eggs, but no meat) (2)
- Pescatarian (consumes fish, but no meat) (3)
- Other (please specify): (4) ________________________________________________
- No (5)
- Prefer not to say (6)

Q14 Have you had any experience with an animal cruelty case?

- Yes - legal professional (1)
- Yes - defendant (2)
- Yes - witness (3)
- Yes - reported cruelty to enforcement agency (4)
- Yes - police (5)
- Yes - animal welfare organisation employee (6)
- No (7)
- Other (please specify) (8) ________________________________________________
- Prefer not to say (9)

End of Block: Introduction and Screener Questions

Start of Block: Main Survey

Q15 Do you think animal cruelty is illegal in Australia?

- Definitely yes (1)
- Probably yes (2)
- It depends (3)
- Probably not (4)
- Definitely not (5)

Q16 Which of the following species do you think SHOULD BE protected from cruelty? (select all that apply)

- Lizard (1)
- Fly (2)
- Kangaroo (3)
- Plant (4)
- Frog (5)
- Crab (6)
- Bird (7)
- Octopus (8)
- Dog (9)
- Fish (10)
- Bee (11)
- ⊗All of the above (12)

Q17 Do you feel confident that you know how and where to report animal cruelty? Rank your confidence level between 0-100 (where 0 means not very confident and 100 means extremely confident)

|  | 0 | 10 | 20 | 30 | 40 | 50 | 60 | 70 | 80 | 90 | 100 |
| --- | --- | --- | --- | --- | --- | --- | --- | --- | --- | --- | --- |

| How confident would you be about how to report animal cruelty? () | 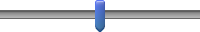 |
| --- | --- |

Q18 Which of the following do you think count as "animal cruelty"? (select all that apply)

- Not giving your pet enough food or water (1)
- Not taking your pet to the vet when it is unwell (2)
- Beating an animal (3)
- Leaving an animal in a hot car (4)
- Failing to register your animals with the council (5)
- Tail docking a lamb (6)
- Abandoning your pet (7)
- I don't know (8)

| Page Break |  |
| --- | --- |

Q19 In your opinion, should animal welfare law enforcement be a public (i.e. government) or a private (i.e. charitable organisation) responsibility?

- Public (1)
- Private (2)

Q20 Which entity do you think is best placed to enforce animal welfare law?

- An existing government department (e.g. local council, Department of Agriculture) (1)
- A new government agency dedicated to animal welfare (e.g. an animal welfare authority) (2)
- The police (3)
- A private charitable organisation (e.g. RSPCA, Animal Welfare League) (4)
- Other (please specify) (5) ________________________________________________

Q21 What enforcement options do you think are currently available to the relevant agency that enforces animal welfare law? (select all that apply)

- Taking the animal away from the owners (1)
- Prosecuting the owners in court (2)
- Educating the owners (3)
- Putting hidden cameras to record potential cruelty (4)
- Issuing a written letter of caution (5)
- Nothing (6)
- Giving an on-the-spot fine (7)
- I don't know (8)

Q22 In 2019 there were 58,487 investigations of animal cruelty nationally conducted by RSPCA. How many of those investigations do you think went to court nationally?

- 3 (1)
- 37 (2)
- 376 (3)
- 3,763 (4)
- 37,631 (5)

| Page Break |  |
| --- | --- |

Q23 From those 58,487 investigations, a total of 376 prosecutions were finalised in court by the RSPCA Australia-wide. Do you think this prosecution rate is adequate?

- Extremely adequate (1)
- Somewhat adequate (2)
- Neither adequate nor inadequate (3)
- Somewhat inadequate (4)
- Extremely inadequate (5)

Q24 In your opinion do you think more animal welfare investigations should go to court?

- Definitely yes (1)
- Probably yes (2)
- It depends (3)
- Probably not (4)
- Definitely not (5)

Q25 Do you think owners should be educated or punished when animal welfare issues occur (e.g. not taking your sick animal to the vet)?

- Educated on appropriate pet care and resources available (1)
- Taken to court and issued with a legal punishment (e.g. fine or jail time) (2)
- It depends on the animal welfare issue and the owner (legal system should decide) (3)

| Page Break |  |
| --- | --- |

Q26 Who do you think should hand out penalties for animal cruelty?

- Enforcement agency (1)
- Judge in court (2)
- Government department (3)
- Police (4)
- I don't know (5)

Q27 What penalties do you think are used for animal cruelty offenders? (select all that apply)

- Community service (1)
- Fine (2)
- Home detention (3)
- Mandated counselling (4)
- Jail time (5)
- Good behaviour bond (6)
- No penalty required (7)
- I don't know (8)

Q28 If someone was found guilty of animal cruelty, do you believe they should be banned from owning animals?

- Definitely yes (1)
- Probably yes (2)
- It depends (3)
- Probably not (4)
- Definitely not (5)

| Page Break |  |
| --- | --- |

Q29 How important do you think it is for the legal system to take animal cruelty seriously when the animal is a COMPANION ANIMAL (e.g. dog, cat)?

- Extremely important (1)
- Very important (2)
- Moderately important (3)
- Slightly important (4)
- Not at all important (5)

Q30 If a COMPANION ANIMAL (eg. dog/cat) dies due to deliberate animal cruelty, what kind of response is required from the legal system? (select all that apply)

- Fine (1)
- Jail time (2)
- Community service (3)
- Good behaviour bond (4)
- Court mandated counselling (5)
- No response needed (6)
- It depends on the circumstances (7)

Q31 How important do you think it is for the legal system to take animal cruelty seriously when the animal is a FARM ANIMAL (e.g. cow, sheep, chicken)?

- Extremely important (1)
- Very important (2)
- Moderately important (3)
- Slightly important (4)
- Not at all important (5)

Q32 If a FARM ANIMAL (e.g. cow, sheep, chicken) dies due to deliberate animal cruelty, what kind of response is currently required by the legal system? (select all that apply)

- Fine (1)
- Jail time (2)
- Community service (3)
- Good behaviour bond (4)
- Court mandated counselling (5)
- No response needed (6)
- It depends on the circumstances (7)

Q33 How important do you think it is for the legal system to take animal cruelty seriously when the victim is a NATIVE ANIMAL (e.g. wombat, kangaroo)?

- Extremely important (1)
- Very important (2)
- Moderately important (3)
- Slightly important (4)
- Not at all important (5)

Q34 How important do you think it is for the legal system to take animal cruelty seriously when the victim is a PEST ANIMAL (e.g. rats, mice, camel)?

- Extremely important (1)
- Very important (2)
- Moderately important (3)
- Slightly important (4)
- Not at all important (5)

| Page Break |  |
| --- | --- |

Q35 In a case where a person deliberately hit an animal causing serious harm, what penalty do you think is suitable?

- Jail time (1)
- Fine (2)
- Good behaviour bond (3)
- Community service (4)
- Court mandated counselling (5)
- No response needed (6)

Q36 In the scenario from the previous question, what, if any, length of jail time do you think is warranted (where 0 equals no jail time necessary and 4 equals four years)

|  | 0 | 1 | 1 | 2 | 2 | 3 | 3 | 4 |
| --- | --- | --- | --- | --- | --- | --- | --- | --- |

| What length of jail time in years would be warranted? () | 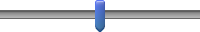 |
| --- | --- |

| Page Break |  |
| --- | --- |

Q37 Previous research has shown that the average penalty for this type of offence (deliberate abuse causing serious harm) is 4 months imprisonment; do you think this is appropriate and sufficient?

- No - needs to be harsher (1)
- No - it is too harsh (2)
- Yes (3)
- It depends on the circumstances of the case (4)

End of Block: Main Survey
